# Supplementary material
Source: publisher figshare collection journal article supplement (https://frontiersin.figshare.com/ndownloader/files/27921318)
Supplement: Supplementary file [file 27921318]

## Supplementary Material

### 1 Supplementary Figures

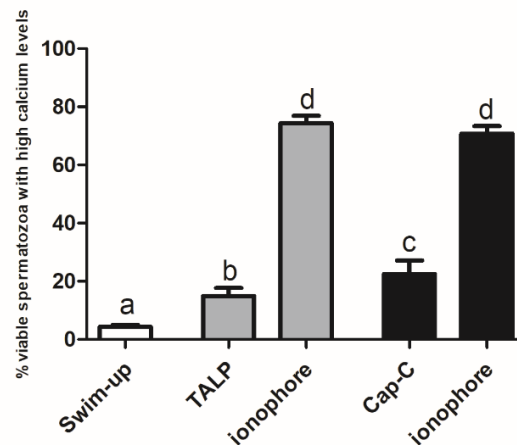

**Supplementary Figure 1.** Percentage of live spermatozoa with high calcium levels (PI-/Fluo- 4-AM+) assessed by flow cytometry before (swim-up, white bars) and after in vitro capacitation without (TALP, grey bars) and with cAMP-elevating agents (Cap-C, black bars) and with calcium ionophore A23187 (ionophore, 1  $\mu$ M). Data are shown as mean  $\pm$  S.E.M. (n = 6). Different letters indicate significant differences ( $p < 0.05$ ).

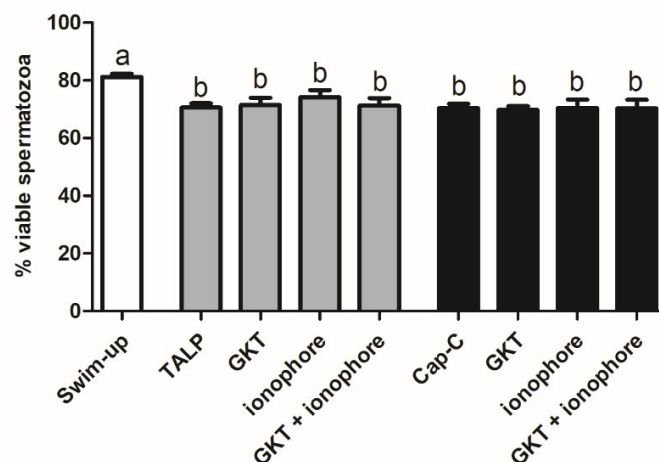

**Supplementary Figure 2.** Percentage of viable spermatozoa before (swim-up, white bars) and after in vitro capacitation without (TALP, grey bars) and with cAMP-elevating agents (Cap-C, black bars) and with GKT136901 (GKT, 1  $\mu$ M) or/and calcium ionophore A23187 (ionophore, 1  $\mu$ M). Data are shown as mean  $\pm$  S.E.M. (n = 6). Different letters indicate significant differences ( $p < 0.05$ ).

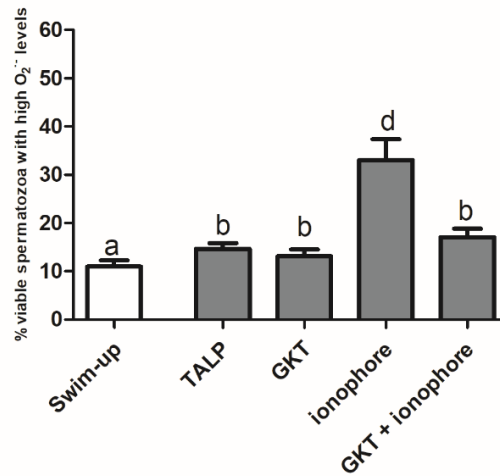

**Supplementary Figure 3.** Percentage of live spermatozoa with high superoxide levels (Yo-Pro-1-/E+) assessed by flow cytometry before (swim-up, white bars) and after in vitro capacitation without cAMP-elevating agents (TALP, grey bars) and with GKT136901 (GKT, 1  $\mu$ M) or/and calcium ionophore A23187 (ionophore, 1  $\mu$ M). Data are shown as mean  $\pm$  S.E.M. (n = 6). Different letters indicate significant differences ( $p < 0.05$ ).

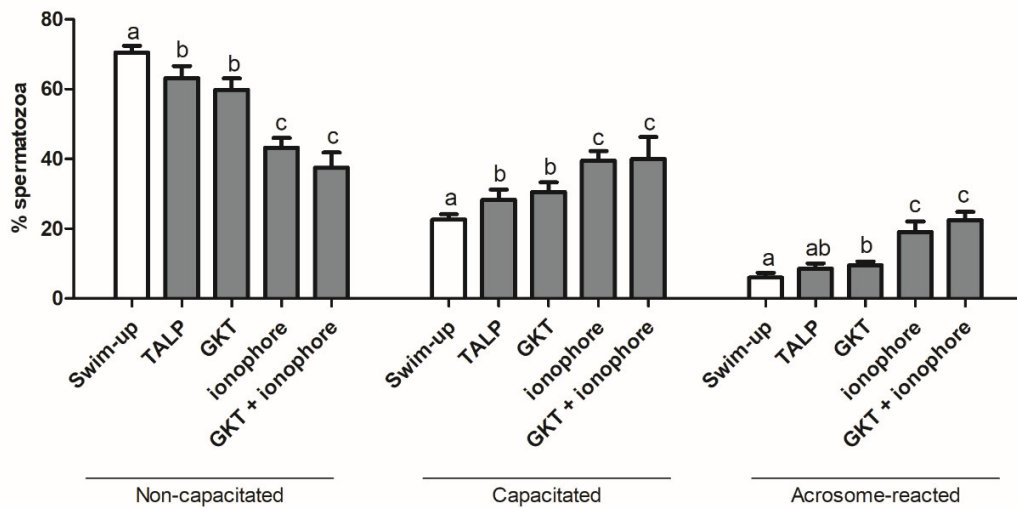

**Supplementary Figure 4.** Assessment of capacitation status, evaluated by chlortetracycline (CTC), in ram spermatozoa before (swim-up, white bars) and after in vitro capacitation without cAMP-elevating agents (TALP, grey bars) and with GKT136901 (GKT, 1  $\mu$ M) or/and calcium ionophore A23187 (ionophore, 1  $\mu$ M). Data of non-capacitated, capacitated and acrosome-reacted spermatozoa are mean percentages  $\pm$  S.E.M (n = 6). Different letters within the same group indicate significant differences ( $p < 0.05$ ).

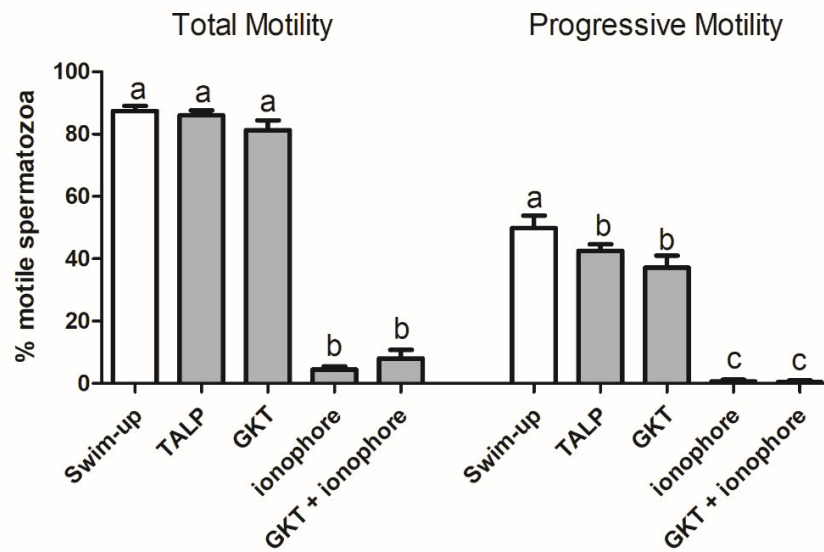

**Supplementary Figure 5.** Percentage of total motile (left) and progressive (right) spermatozoa before (swim-up, white bars) and after in vitro capacitation without cAMP-elevating agents (TALP, grey bars) and with GKT136901 (GKT, 1  $\mu$ M) or/and calcium ionophore A23187 (ionophore, 1  $\mu$ M). Data are shown as mean  $\pm$  S.E.M. (n = 6). Different letters indicate significant differences ( $p < 0.05$ ).
